# Supplementary material for: TP53 and OSBPL10 alterations in diffuse large B-cell lymphoma: prognostic markers identified via exome analysis of cases with extreme prognosis
Source: PubMed Central journal article supplement (PMC5929408; doi:10.18632/oncotarget.24656), 2018-04-13
Supplement: oncotarget-09-19555-s001.pdf [file oncotarget-09-19555-s001.pdf]

## TP53 and OSBPL10 alterations in diffuse large B-cell lymphoma: prognostic markers identified via exome analysis of cases with extreme prognosis

### SUPPLEMENTARY MATERIALS

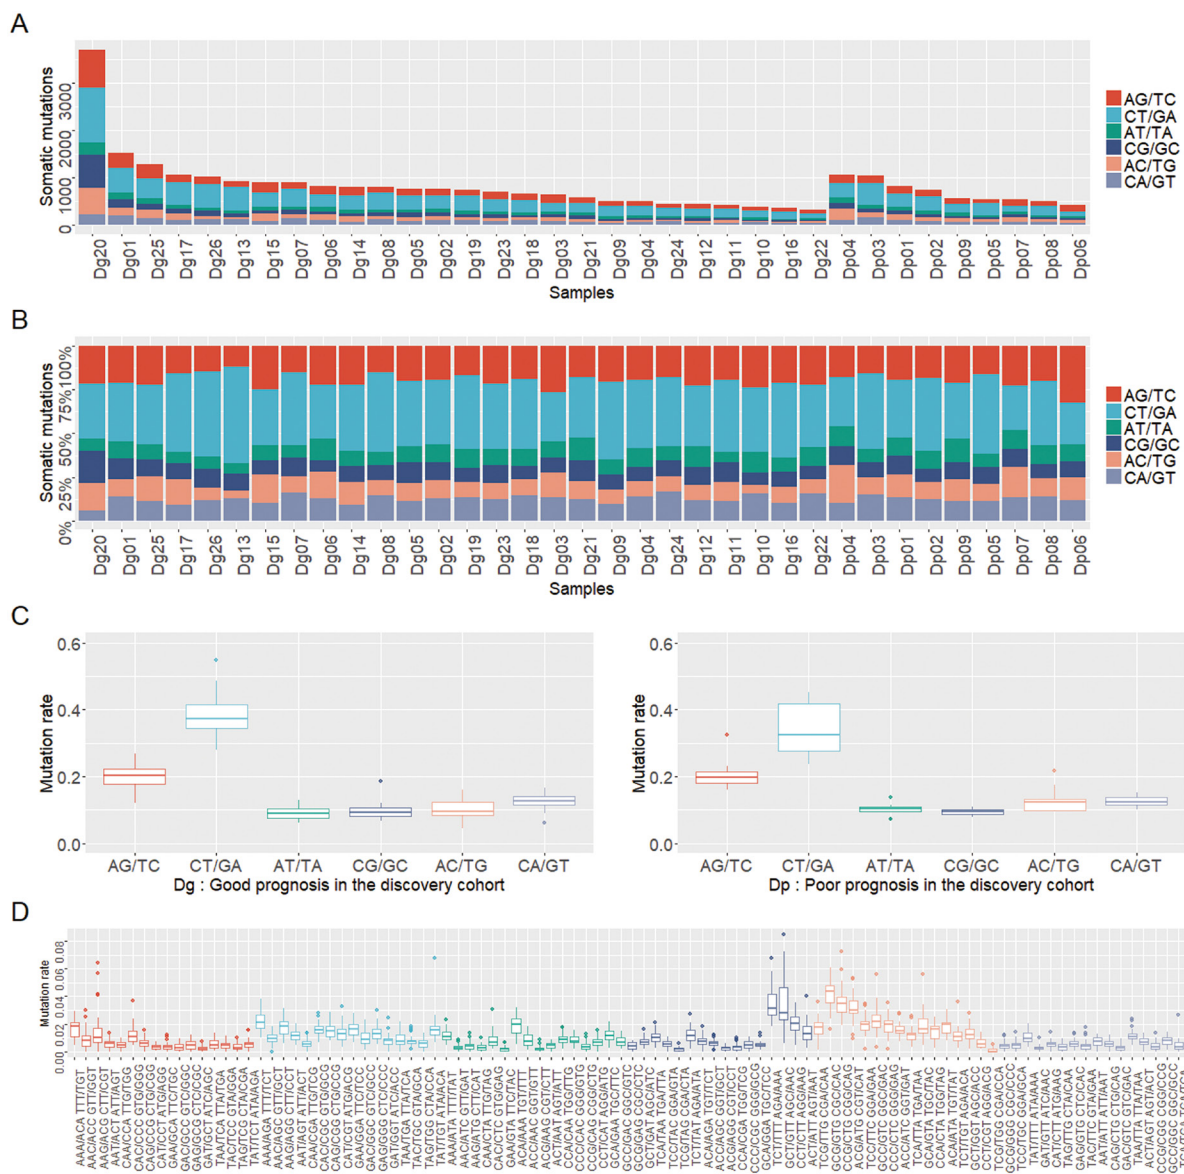

**Supplementary Figure 1: Analysis of mutation overview.** (A) The number of mutations. (B, C) The proportion of mutated bases. In both prognostic groups, CT/GA transversions were the most frequent variants. (D) Mutations as triplets, XCG XTG/CGX CAX, were frequently observed.

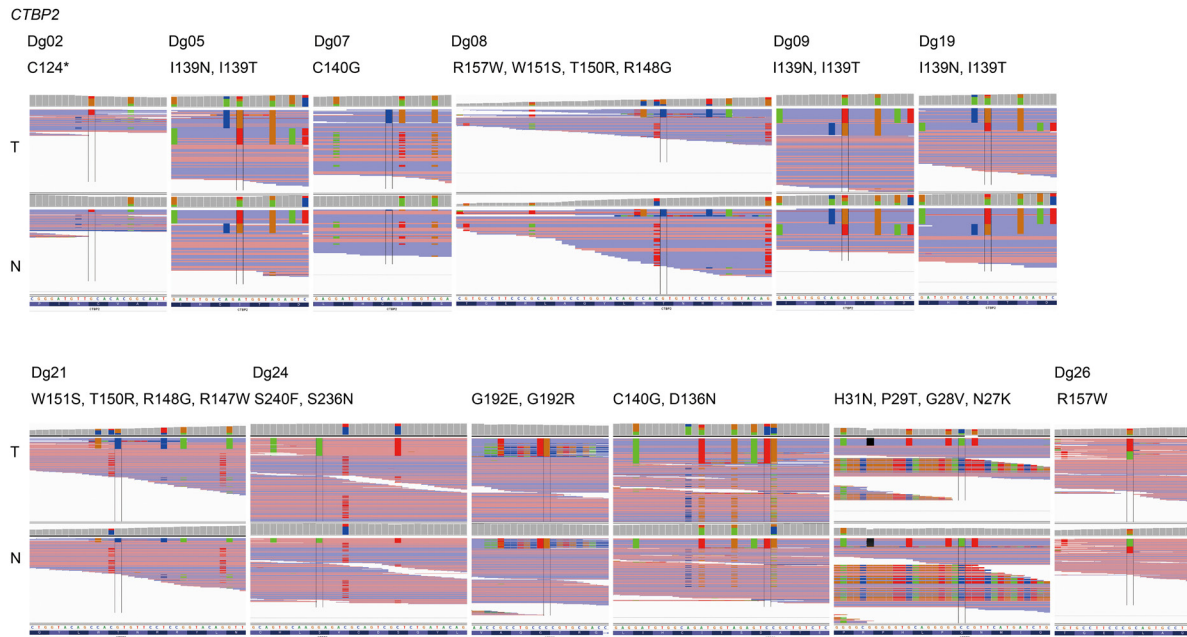

**Supplementary Figure 2: Manual inspection with IGV.** IGV view of *CTBP2* mutations. In both tumor and normal samples, many *CTBP2* mutations were detected from a single read, which is likely due to mapping errors.

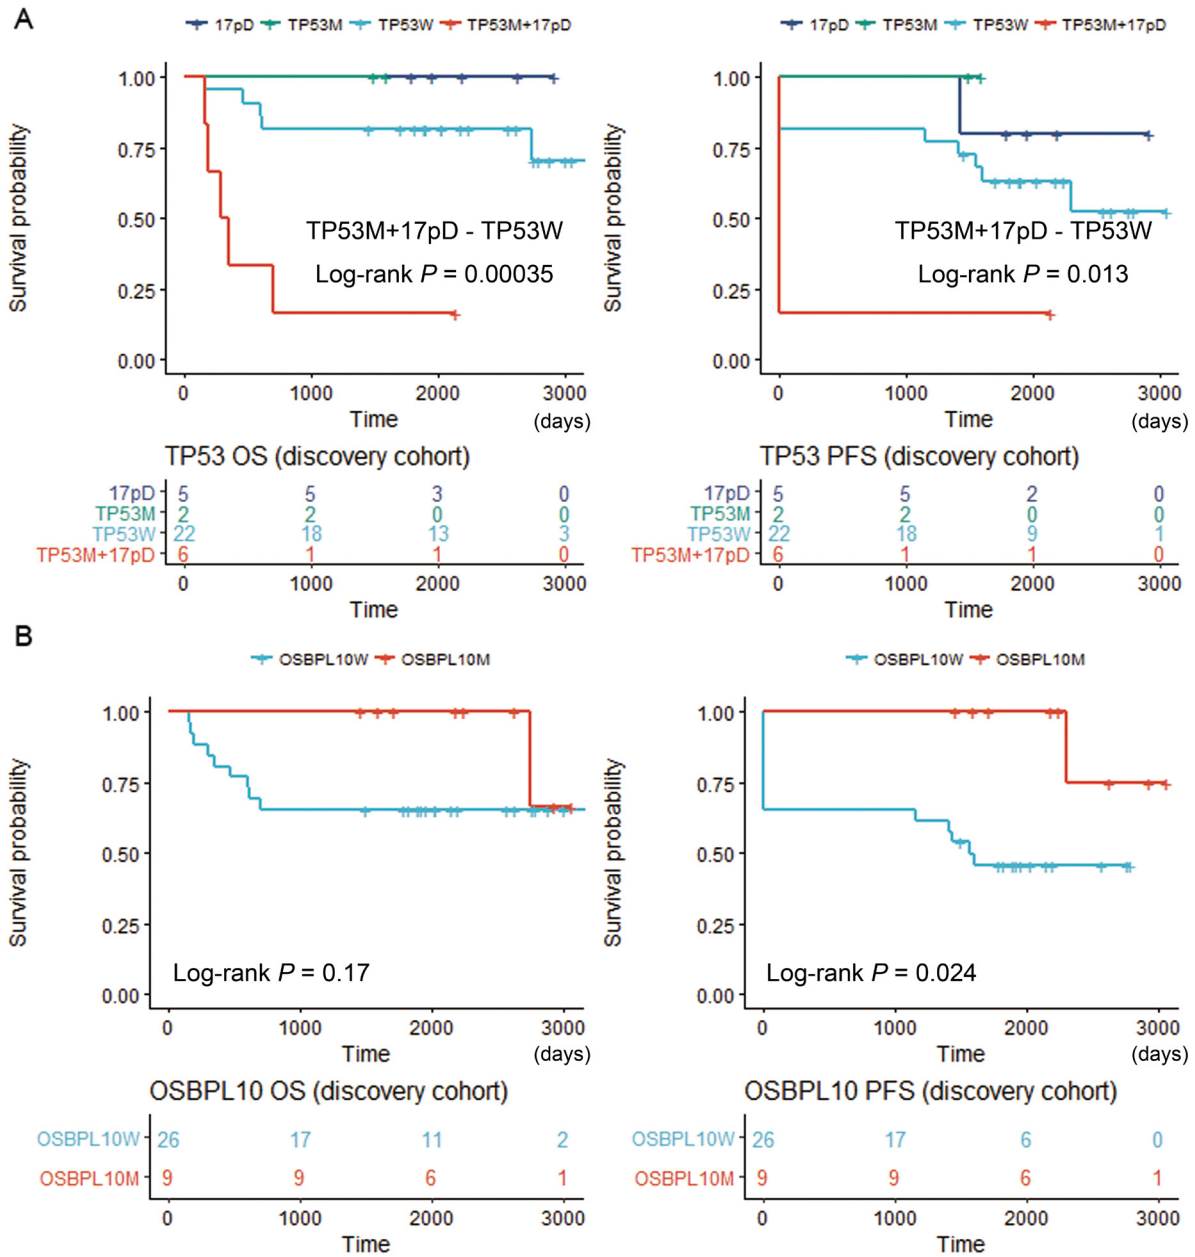

**Supplementary Figure 3: Prognostic values of *TP53* and *OSBPL10* aberrations in the discovery cohort.** (A) Survival stratified by *TP53* status in the discovery cohort. (B) Survival stratified by *OSBPL10* status in the discovery cohort. TP53W: *TP53* wild-type; TP53M: *TP53* mutation; 17pD: 17p deletion; OSBPL10W: *OSBPL10* wild-type; and OSBPL10M: *OSBPL10* mutation.

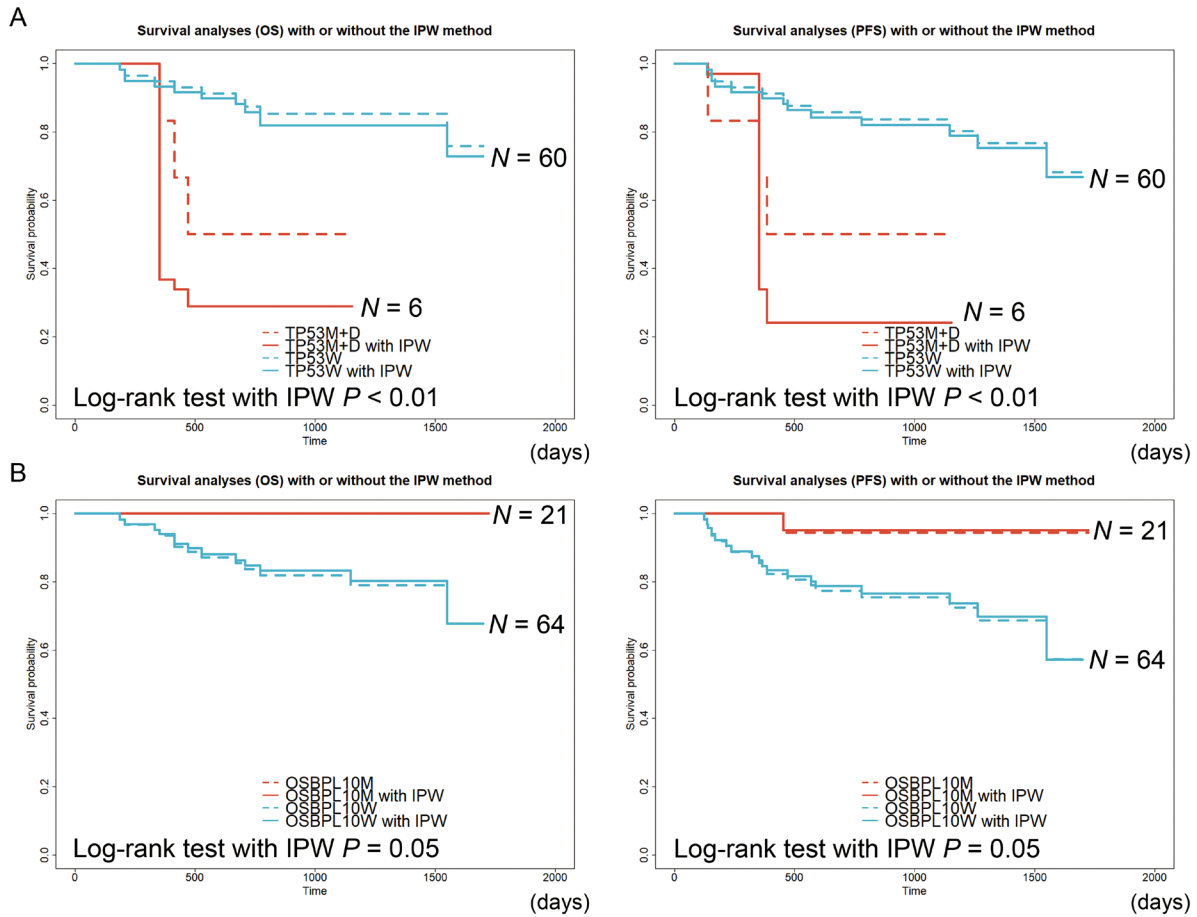

**Supplementary Figure 4: Survival analyses with or without the IPW method.** (A) Survival stratified by *TP53* status in the validation cohort. Variable IPI factors (age, clinical stage, LDH, ECOG-PS and extranodal lesion) and *OSBPL10* mutations were incorporated into the propensity score model. (B) Survival stratified by *OSBPL10* status in the validation cohort. Variable IPI factors (age, clinical stage, LDH, ECOG-PS and extranodal lesion) and *TP53* mutations with deletion were incorporated into the propensity score model. TP53W: *TP53* wild-type; TP53M + D: *TP53* mutation with deletion; OSBPL10W: *OSBPL10* wild-type, and OSBPL10M: *OSBPL10* mutation.

**Supplementary Table 1: Clinical features of the cases**

See Supplementary File 1

**Supplementary Table 2: Summary of discovery cohort (Dp/Dg)**

| <b>Case no.</b> | <b>Estimated tumor content</b> | <b>Tumor read count</b> | <b>Normal read count</b> | <b>Tumor mean coverage</b> | <b>Normal mean coverage</b> |
|-----------------|--------------------------------|-------------------------|--------------------------|----------------------------|-----------------------------|
| Dp01            | 49.76%                         | 373940632               | 136990566                | 196.08                     | 113.53                      |
| Dp02            | 85.31%                         | 410472888               | 129055310                | 277.00                     | 117.68                      |
| Dp03            | 75.26%                         | 397613058               | 139262220                | 260.47                     | 122.23                      |
| Dp04            | 40.01%                         | 441213896               | 201387688                | 256.57                     | 151.33                      |
| Dp05            | 89.16%                         | 421244714               | 230629374                | 235.66                     | 159.51                      |
| Dp06            | 53.90%                         | 365128840               | 176025412                | 345.58                     | 176.91                      |
| Dp07            | 55.59%                         | 436434846               | 190379370                | 346.50                     | 175.38                      |
| Dp08            | 54.93%                         | 413668164               | 198094866                | 354.51                     | 182.00                      |
| Dp09            | 83.09%                         | 408791042               | 182424376                | 164.98                     | 164.29                      |
| Dg01            | 69.01%                         | 373607706               | 318469368                | 246.97                     | 228.57                      |
| Dg02            | 42.79%                         | 345028350               | 317723674                | 234.53                     | 216.58                      |
| Dg03            | 30.98%                         | 462074896               | 188928072                | 265.39                     | 145.64                      |
| Dg04            | 46.91%                         | 418957674               | 166095014                | 199.95                     | 117.90                      |
| Dg05            | 69.17%                         | 405672354               | 188951040                | 260.12                     | 140.94                      |
| Dg06            | 46.74%                         | 308925900               | 320051672                | 229.14                     | 227.86                      |
| Dg07            | 57.43%                         | 372825502               | 214892086                | 240.75                     | 147.32                      |
| Dg08            | 81.94%                         | 461159888               | 184365050                | 387.61                     | 176.01                      |
| Dg09            | 31.24%                         | 395665268               | 190121156                | 353.34                     | 185.37                      |
| Dg10            | 46.69%                         | 432748322               | 191748358                | 380.95                     | 181.05                      |
| Dg11            | 31.65%                         | 367943704               | 196731474                | 340.87                     | 193.08                      |
| Dg12            | 59.04%                         | 451985760               | 205511240                | 347.51                     | 187.04                      |
| Dg13            | 63.36%                         | 426718718               | 190970484                | 390.59                     | 193.71                      |
| Dg14            | 49.21%                         | 414677588               | 197144022                | 362.85                     | 162.94                      |
| Dg15            | 75.68%                         | 364776504               | 186065374                | 330.48                     | 186.46                      |
| Dg16            | 50.79%                         | 391319262               | 196419924                | 346.20                     | 192.36                      |
| Dg17            | 44.64%                         | 385161446               | 199274962                | 357.62                     | 200.13                      |
| Dg18            | 37.35%                         | 394245978               | 184924552                | 362.70                     | 185.44                      |
| Dg19            | 60.05%                         | 374064268               | 190517942                | 345.63                     | 190.43                      |
| Dg20            | 64.73%                         | 410967124               | 208163130                | 356.80                     | 197.30                      |
| Dg21            | 67.39%                         | 447603874               | 192539016                | 303.10                     | 164.42                      |
| Dg22            | 36.74%                         | 456688072               | 187724474                | 330.95                     | 161.40                      |
| Dg23            | 35.98%                         | 466685312               | 180109868                | 335.56                     | 160.10                      |
| Dg24            | 72.68%                         | 418532916               | 178647518                | 337.80                     | 168.71                      |
| Dg25            | 54.81%                         | 351967470               | 208790576                | 304.20                     | 180.85                      |
| Dg26            | 62.59%                         | 284959294               | 161439200                | 231.51                     | 141.14                      |

**Supplementary Table 3: Mutations in discovery cohort (Dp/Dg) (five cases and above)**

See Supplementary File 1

**Supplementary Table 4: Mutations in validation cohort (V)**

| Case no. | CHR   | POS      | REF                                                 | ALT | refGene_Gene | refGene_No     | refGene_AAACH  | SIFT | Deleterious:<br>( $\leq 0.05$ ),<br>Tolerated:<br>( $> 0.05$ ) | Polyphen2_<br>HVAR | Probably damaging : ( $\geq 0.957$ ),<br>Possibly damaging : ( $\geq 0.453$ ),<br>Benign : ( $< 0.453$ ) |
|----------|-------|----------|-----------------------------------------------------|-----|--------------|----------------|----------------|------|----------------------------------------------------------------|--------------------|----------------------------------------------------------------------------------------------------------|
| V14      | chr17 | 7577029  | G                                                   | C   | TP53         | NM_000546.5    | S303R          | 0.06 | Tolerated                                                      | 0.817              | Possibly damaging                                                                                        |
| V83      | chr17 | 7577081  | T                                                   | C   | TP53         | NM_000546.5    | E286G          | 0    | Deleterious                                                    | 0.995              | Probably damaging                                                                                        |
| V84      | chr17 | 7577085  | C                                                   | T   | TP53         | NM_000546.5    | E285K          | 0    | Deleterious                                                    | 0.998              | Probably damaging                                                                                        |
| V72      | chr17 | 7577100  | T                                                   | C   | TP53         | NM_000546.5    | R280G          | 0    | Deleterious                                                    | 1                  | Probably damaging                                                                                        |
| V77      | chr17 | 7577105  | G                                                   | C   | TP53         | NM_000546.5    | P278R          | 0    | Deleterious                                                    | 1                  | Probably damaging                                                                                        |
| V17      | chr17 | 7577120  | C                                                   | T   | TP53         | NM_000546.5    | R273H          | 0.01 | Deleterious                                                    | 0.989              | Probably damaging                                                                                        |
| V31      | chr17 | 7577121  | G                                                   | A   | TP53         | NM_000546.5    | R273C          | 0    | Deleterious                                                    | 0.999              | Probably damaging                                                                                        |
| V35      | chr17 | 7577534  | C                                                   | G   | TP53         | NM_000546.5    | R249S          | 0.01 | Deleterious                                                    | 0.992              | Probably damaging                                                                                        |
| V67      | chr17 | 7577539  | G                                                   | A   | TP53         | NM_000546.5    | R248W          | 0    | Deleterious                                                    | 1                  | Probably damaging                                                                                        |
| V84      | chr17 | 7577547  | C                                                   | A   | TP53         | NM_000546.5    | G245V          | 0    | Deleterious                                                    | 1                  | Probably damaging                                                                                        |
| V06      | chr17 | 7577550  | C                                                   | T   | TP53         | NM_000546.5    | G244D          | 0    | Deleterious                                                    | 1                  | Probably damaging                                                                                        |
| V80      | chr17 | 7577566  | T                                                   | C   | TP53         | NM_000546.5    | N239D          | 0    | Deleterious                                                    | 0.999              | Probably damaging                                                                                        |
| V51      | chr17 | 7577568  | C                                                   | T   | TP53         | NM_000546.5    | C238Y          | 0    | Deleterious                                                    | 1                  | Probably damaging                                                                                        |
| V68      | chr17 | 7577569  | A                                                   | G   | TP53         | NM_000546.5    | C238R          | 0    | Deleterious                                                    | 1                  | Probably damaging                                                                                        |
| V68      | chr17 | 7577572  | T                                                   | G   | TP53         | NM_000546.5    | M237L          | 0    | Deleterious                                                    | 0.999              | Probably damaging                                                                                        |
| V68      | chr17 | 7577583  | T                                                   | A   | TP53         | NM_000546.5    | H233L          | 1    | Tolerated                                                      | 0.055              | Benign                                                                                                   |
| V43      | chr17 | 7578196  | A                                                   | T   | TP53         | NM_000546.5    | V218E          | 0    | Deleterious                                                    | 1                  | Probably damaging                                                                                        |
| V25      | chr17 | 7578212  | G                                                   | A   | TP53         | NM_000546.5    | R213*          | 1    | Tolerated                                                      | .                  | .                                                                                                        |
| V76      | chr17 | 7578526  | C                                                   | A   | TP53         | NM_000546.5    | C135F          | 0.01 | Deleterious                                                    | 1                  | Probably damaging                                                                                        |
| V78      | chr17 | 7578550  | G                                                   | T   | TP53         | NM_000546.5    | S127Y          | 0    | Deleterious                                                    | 1                  | Probably damaging                                                                                        |
| V42      | chr17 | 7579705  | C                                                   | T   | TP53         | NM_000546.5    | V31I           | 0.59 | Tolerated                                                      | 0.004              | Benign                                                                                                   |
| V14      | chr17 | 7579882  | C                                                   | G   | TP53         | NM_001126112.2 | E11Q           | 0.03 | Deleterious                                                    | 0.972              | Probably damaging                                                                                        |
| V50      | chr3  | 32022391 | C                                                   | G   | OSBPL10      | NM_001174060.1 | R94T           | .    | .                                                              | 0.993              | Probably damaging                                                                                        |
| V56      | chr3  | 32022391 | C                                                   | G   | OSBPL10      | NM_001174060.1 | R94T           | .    | .                                                              | 0.993              | Probably damaging                                                                                        |
| V52      | chr3  | 32022402 | GC                                                  | G   | OSBPL10      | NM_001174060.1 | G90            | .    | .                                                              | .                  | .                                                                                                        |
| V52      | chr3  | 32022406 | TGGAGGA<br>GGTTGGTG<br>TATTGGCT<br>GAGCACGC<br>CCTC | T   | OSBPL10      | NM_001174060.1 | EGVLSKYTNLLQ78 | .    | .                                                              | .                  | .                                                                                                        |
| V33      | chr3  | 32022431 | G                                                   | A   | OSBPL10      | NM_001174060.1 | L81F           | 0    | Deleterious                                                    | 1                  | Probably damaging                                                                                        |
| V63      | chr3  | 32022449 | G                                                   | A   | OSBPL10      | NM_001174060.1 | P75S           | 0.36 | Tolerated                                                      | 0.172              | Benign                                                                                                   |
| V46      | chr3  | 32022480 | G                                                   | T   | OSBPL10      | NM_001174060.1 | S64R           | 0.06 | Tolerated                                                      | 0.029              | Benign                                                                                                   |
| V25      | chr3  | 32022505 | C                                                   | A   | OSBPL10      | NM_001174060.1 | S56I           | 0.04 | Deleterious                                                    | 0.001              | Benign                                                                                                   |
| V39      | chr3  | 32022541 | G                                                   | A   | OSBPL10      | NM_001174060.1 | S44L           | 0.39 | Tolerated                                                      | 0.005              | Benign                                                                                                   |
| V25      | chr3  | 32022553 | AC                                                  | A   | OSBPL10      | NM_001174060.1 | V40            | .    | .                                                              | .                  | .                                                                                                        |
| V61      | chr3  | 32022557 | C                                                   | T   | OSBPL10      | NM_001174060.1 | G39R           | 0    | Deleterious                                                    | 0.131              | Benign                                                                                                   |
| V66      | chr3  | 32022581 | G                                                   | A   | OSBPL10      | NM_001174060.1 | P31S           | 0.13 | Tolerated                                                      | 0.118              | Benign                                                                                                   |
| V66      | chr3  | 32022601 | G                                                   | C   | OSBPL10      | NM_001174060.1 | A24G           | 0.36 | Tolerated                                                      | 0.079              | Benign                                                                                                   |
| V26      | chr3  | 32022601 | G                                                   | C   | OSBPL10      | NM_001174060.1 | A24G           | 0.36 | Tolerated                                                      | 0.079              | Benign                                                                                                   |
| V81      | chr3  | 32022602 | C                                                   | T   | OSBPL10      | NM_001174060.1 | A24T           | 0.14 | Tolerated                                                      | 0.059              | Benign                                                                                                   |
| V57      | chr3  | 32022606 | G                                                   | T   | OSBPL10      | NM_001174060.1 | S22R           | 0.04 | Deleterious                                                    | 0.029              | Benign                                                                                                   |
| V14      | chr3  | 32022613 | C                                                   | A   | OSBPL10      | NM_001174060.1 | S20I           | 0.16 | Tolerated                                                      | 0.795              | Possibly damaging                                                                                        |
| V39      | chr3  | 32022623 | T                                                   | G   | OSBPL10      | NM_001174060.1 | S17R           | 0.04 | Deleterious                                                    | 0.137              | Benign                                                                                                   |
| V62      | chr3  | 32022625 | C                                                   | G   | OSBPL10      | NM_001174060.1 | S16T           | 0.3  | Tolerated                                                      | 0.332              | Benign                                                                                                   |
| V33      | chr3  | 32022625 | C                                                   | T   | OSBPL10      | NM_001174060.1 | S16N           | 0.09 | Tolerated                                                      | 0.61               | Possibly damaging                                                                                        |
| V48      | chr3  | 32022625 | C                                                   | T   | OSBPL10      | NM_001174060.1 | S16N           | 0.09 | Tolerated                                                      | 0.61               | Possibly damaging                                                                                        |
| V65      | chr3  | 32022630 | G                                                   | C   | OSBPL10      | NM_001174060.1 | S14R           | 0.08 | Tolerated                                                      | 0.612              | Possibly damaging                                                                                        |
| V02      | chr3  | 32022631 | C                                                   | G   | OSBPL10      | NM_001174060.1 | S14T           | 0.23 | Tolerated                                                      | 0.31               | Benign                                                                                                   |
| V66      | chr3  | 32022636 | CCCG                                                | C   | OSBPL10      | NM_001174060.1 | GG11G          | .    | .                                                              | .                  | .                                                                                                        |
| V46      | chr3  | 32022642 | GCCGTC                                              | G   | OSBPL10      | NM_001174060.1 | DG9            | .    | .                                                              | .                  | .                                                                                                        |
| V40      | chr3  | 32022646 | T                                                   | C   | OSBPL10      | NM_001174060.1 | D9G            | 0.2  | Tolerated                                                      | 0.001              | Benign                                                                                                   |
| V31      | chr3  | 32022662 | C                                                   | T   | OSBPL10      | NM_001174060.1 | A4T            | 0.07 | Tolerated                                                      | 0.431              | Benign                                                                                                   |
| V26      | chr3  | 32022668 | C                                                   | T   | OSBPL10      | NM_001174060.1 | E2K            | 0    | Deleterious                                                    | 0.227              | Benign                                                                                                   |
| V28      | chr3  | 32022668 | C                                                   | G   | OSBPL10      | NM_001174060.1 | E2Q            | 0    | Deleterious                                                    | 0.362              | Benign                                                                                                   |



**Supplementary Table 5: Analysis of *TP53* gene copy number variation**

See Supplementary File 1

**Supplementary Table 6: *OSBPL10* was identified as a SHM target**

| Gene     | Total SNVs | Motif mutation | Transition mutation | C:G mutation | Mutation case (total 35 cases) | Gene length | SHM indicator |
|----------|------------|----------------|---------------------|--------------|--------------------------------|-------------|---------------|
| PIM1*    | 588        | 426            | 406                 | 583          | 19                             | 1206        | < 0.001       |
| IGLL5    | 482        | 359            | 254                 | 429          | 22                             | 639         | < 0.001       |
| PABPC3   | 386        | 69             | 276                 | 151          | 14                             | 1892        | < 0.001       |
| KCNJ18   | 214        | 0              | 102                 | 214          | 8                              | 1298        | < 0.001       |
| CTBP2    | 209        | 31             | 93                  | 111          | 12                             | 2946        | 0.0025        |
| ZNF717   | 161        | 14             | 89                  | 135          | 19                             | 2738        | 0.0018        |
| MUC3A    | 161        | 25             | 75                  | 76           | 17                             | 4444        | 0.0068        |
| ATAD3B   | 120        | 0              | 120                 | 120          | 8                              | 1928        | < 0.001       |
| MUC6     | 110        | 20             | 23                  | 98           | 16                             | 7284        | < 0.001       |
| LDHAL6B  | 108        | 27             | 84                  | 30           | 3                              | 1142        | 0.0073        |
| MTCH2    | 107        | 3              | 81                  | 32           | 12                             | 929         | < 0.001       |
| CD79B    | 90         | 4              | 63                  | 7            | 8                              | 684         | < 0.001       |
| PABPC1   | 88         | 6              | 39                  | 24           | 13                             | 1894        | < 0.001       |
| SHANK1   | 87         | 29             | 86                  | 59           | 7                              | 6460        | 0.1289        |
| MUC16    | 85         | 20             | 55                  | 57           | 22                             | 43437       | 0.7279        |
| HLA-DRB5 | 83         | 36             | 40                  | 36           | 9                              | 792         | 0.0627        |
| CDC27    | 76         | 30             | 66                  | 0            | 7                              | 2471        | < 0.001       |
| HLA-DRB1 | 74         | 37             | 32                  | 35           | 8                              | 3910        | 0.0408        |
| MYD88    | 72         | 4              | 68                  | 8            | 8                              | 946         | < 0.001       |
| BTG1*    | 71         | 53             | 54                  | 67           | 8                              | 511         | 0.0024        |
| DUSP2*   | 71         | 42             | 57                  | 62           | 8                              | 938         | 0.0273        |
| WDR89    | 69         | 14             | 50                  | 35           | 5                              | 1160        | 0.2697        |
| ANKLE1   | 68         | 0              | 0                   | 8            | 9                              | 1998        | < 0.001       |
| AK2      | 63         | 52             | 32                  | 61           | 5                              | 711         | 0.0013        |
| HLA-A    | 63         | 17             | 37                  | 52           | 9                              | 8691        | 0.5857        |
| SHANK3   | 61         | 21             | 61                  | 17           | 4                              | 5129        | 0.0176        |
| GXYLT1   | 61         | 10             | 44                  | 33           | 6                              | 1312        | 0.2553        |
| AQP7     | 58         | 1              | 32                  | 57           | 6                              | 1019        | 0.0060        |
| SGK1*    | 52         | 23             | 30                  | 30           | 4                              | 1564        | 0.3608        |
| SOCS1*   | 51         | 30             | 29                  | 47           | 5                              | 632         | 0.0716        |
| HLA-DQB2 | 44         | 12             | 22                  | 28           | 3                              | 6288        | 0.6454        |
| CNN2     | 43         | 31             | 39                  | 24           | 5                              | 983         | 0.0232        |
| FMN2     | 43         | 10             | 24                  | 24           | 9                              | 5159        | 0.5862        |
| HLA-B    | 41         | 22             | 13                  | 30           | 6                              | 6474        | 0.0885        |
| MPEG1    | 40         | 28             | 31                  | 40           | 3                              | 2147        | 0.0307        |
| HNRNPL   | 39         | 0              | 36                  | 0            | 3                              | 1754        | < 0.001       |
| FAM8A1   | 34         | 3              | 22                  | 29           | 7                              | 1234        | 0.2246        |
| OSBPL10  | 30         | 28             | 22                  | 27           | 11                             | 2280        | 0.0175        |
| KLRC2    | 29         | 25             | 4                   | 25           | 7                              | 687         | 0.0039        |
| IGSF3    | 29         | 0              | 16                  | 24           | 10                             | 3631        | 0.0759        |
| ARMC4    | 28         | 8              | 0                   | 20           | 5                              | 3113        | 0.0109        |
| FAM205A  | 28         | 18             | 28                  | 9            | 6                              | 4001        | 0.0387        |
| KMT5A    | 28         | 8              | 24                  | 20           | 3                              | 2792        | 0.6560        |
| MESP2    | 26         | 1              | 26                  | 16           | 5                              | 1189        | 0.1239        |
| BTG2*    | 26         | 14             | 16                  | 23           | 7                              | 472         | 0.3218        |
| DSPP     | 24         | 6              | 24                  | 6            | 2                              | 3899        | 0.1411        |
| BCL2*    | 24         | 14             | 18                  | 23           | 6                              | 715         | 0.1977        |
| PRSS1    | 23         | 7              | 10                  | 17           | 5                              | 736         | 0.6881        |
| ADAM21   | 22         | 0              | 22                  | 10           | 4                              | 2165        | 0.0649        |
| DTX1*    | 22         | 16             | 16                  | 20           | 6                              | 1851        | 0.1379        |
| TAS2R43  | 22         | 6              | 19                  | 4            | 7                              | 926         | 0.1430        |
| HIST1H1E | 22         | 13             | 18                  | 22           | 12                             | 656         | 0.1831        |

**Supplementary Table 7: Confirmation by direct sequencing**

See Supplementary File 1

**Supplementary Table 8: Primers for real-time genomic PCR of *TP53* and *GAPDH***

| <b>Gene</b>  | <b>Forward primer</b>    | <b>Reverse primer</b>    | <b>Product size (bp)</b> |
|--------------|--------------------------|--------------------------|--------------------------|
| <i>TP53</i>  | CACAGCACATGACGGAGGTTG    | GTCATCCAAATACTCCACACGCA  | 209                      |
| <i>GAPDH</i> | CTGACCTGCCGTCTAGAAAAACCT | CAGGAAATGAGCTTGACAAAGTGG | 206                      |
